# Supplementary material
Source: PubMed Central journal article supplement (PMC6346136)
Supplement: 2e8e6aa1ccc90367c32ce0dd3fa85c13_IAI.00772-18-s0001.pdf [file 2e8e6aa1ccc90367c32ce0dd3fa85c13_IAI.00772-18-s0001.pdf]

## Supplemental materials

**Supplementary Table 1.** Oligonucleotides used for quantitative RT-PCR

| cDNA Target  | Primer Sequence (5'-3')      |                            | Accession no. <sup>1</sup> | Annealing temp (°C) | References |
|--------------|------------------------------|----------------------------|----------------------------|---------------------|------------|
|              | Forward                      | Reverse                    |                            |                     |            |
| 28S          | GGCGAAGCCAGAGGAAACT          | GACGACCGATTTGCACGTC        | AH001604                   | 61                  | (1)        |
| GAPDH        | TGTGACTTCAATGGTGACAGC        | GCTATATCCAACTCATTGTGCATACC | NM_204305                  | 55                  | (2)        |
| TATA-BP      | TAGCCCGATGATGCCGTAT          | GTTCCCTGTGTGCGTTGC         | D83127                     | 58                  | (3)        |
| IFN $\gamma$ | GTGAAGAAGGTGAAAGATATCATGGA   | GCTTTGCGCTGGATTCTCA        | Y07922                     | 59                  | (4)        |
| iNOS         | TTGGAAACCAAAGTGTGTAATATCTTG  | CCCTGGCCATGCGTACAT         | U46504                     | 59                  | (1)        |
| IL-1 $\beta$ | GCTCTACATGTCGTGTGTGATGAG     | TGTCGATGTCCCGCATGA         | AJ245728                   | 59                  | (4)        |
| IL-2         | TTGGAAAATATCAAGAACAAGATTCATC | TCCCAGGTAACACTGCAGAGTTT    | AJ009800                   | 59                  | (4)        |
| IL-6         | GCTCGCCGGCTTCGA              | GGTAGGCTGAAAGGCGAACAG      | AJ250838                   | 59                  | (1)        |
| IL-10        | CATGCTGCTGGGCCTGAA           | CGTCTCCTTGATCTGCTTGATG     | AJ621614                   | 59                  | (5)        |
| IL-13        | CACCCAGGGCATCCAGAA           | TCCGCAGGTAGATCTCAT         | AJ621250                   | 55                  | (6)        |
| Muc2         | ATGCGATGTTAACACAGGACTC       | GTGGAGCACAGCAGACTTTG       | JX284122                   | 60                  | (2)        |
| Muc5ac       | TGTGGTTGCTATGAGAATGGA        | TTGCCATGGTTTGTGCAT         | XM_015286693               | 60                  | (2)        |
| Muc13        | GCATTCTCAAGCAGAGGTG          | CTCAGGCTGCCGTGATATTT       | XM_003641585               | 60                  | (2)        |

<sup>1</sup>Genomic DNA sequence (NCBI GenBank)

## Supplemental materials and methods

Influence of dietary *N*-acetylcysteine supplementation: Following quantification of the impact of *E. tenella* infection on *C. jejuni* load in the caeca, liver, and spleen, the mucus-thinning food supplement N-acetylcysteine (NAC, Sigma-Aldrich) (7, 8) was mixed with the standard diet to investigate association between *Eimeria* induced mucogenesis and *C. jejuni* load. Briefly, groups of eight individually caged Light Sussex chickens were either left unexposed to NAC (Groups 1-3; NAC-) or received 5 g NAC per Kg feed from 13 days of age (Groups 4-6; NAC+ (9)). Co-infection schedules included mock challenge with sterile MH broth at 18 days of age (Groups 1 and 4; E-/C-),  $\sim 10^8$  CFU *C. jejuni* at 18 days of age (Groups 2 and 5; E-/C+) or 4,000 sporulated *E. tenella* oocysts at 13 days of age plus  $\sim 10^8$  CFU *C. jejuni* at 18 days of age (Groups 3 and 6; nE+/C+). All chickens were culled three days post bacterial challenge (21 days of age) and samples collected as described for trial 1. Intestinal sections were collected for periodic acid–Schiff (PAS) staining to assess the influence of NAC supplementation on mucosubstances within the intestinal lumen.

**Supplementary Table 2.** *Campylobacter jejuni* and *Eimeria tenella* dose regimes and viable counts from single and co-infection of chickens fed diets with or without *N*-acetylcysteine (NAC).

| Group  | NAC | <i>E. tenella</i><br>(dose; age at dosing) | Log <sub>10</sub> <i>C. jejuni</i><br>CFU dose (d18) | Log <sub>10</sub> output<br>oocysts/bird | Log <sub>10</sub> CFU/g Day 21 (three days post <i>C. jejuni</i> ) |                          |                          |
|--------|-----|--------------------------------------------|------------------------------------------------------|------------------------------------------|--------------------------------------------------------------------|--------------------------|--------------------------|
|        |     |                                            |                                                      |                                          | Caeca                                                              | Liver                    | Spleen                   |
| nE+/C+ | -   | Wis (4,000; d13)                           | 8.27                                                 | 6.89 ± 0.08 <sup>a</sup>                 | 7.51 ± 0.68 <sup>b</sup>                                           | 2.14 ± 0.54 <sup>b</sup> | 2.05 ± 0.43 <sup>b</sup> |
| nE-/C+ | -   | None                                       | 8.27                                                 | nd                                       | 6.55 ± 0.22 <sup>a</sup>                                           | 3.17 ± 0.11 <sup>a</sup> | 2.89 ± 0.25 <sup>a</sup> |
| nE-/C- | -   | None                                       | Mock                                                 | nd                                       | nd                                                                 | nd                       | nd                       |
| nE+/C+ | +   | Wis (4,000; d13)                           | 8.27                                                 | 6.91 ± 0.10 <sup>a</sup>                 | 5.91 ± 0.66 <sup>a</sup>                                           | 1.32 ± 0.38 <sup>c</sup> | 1.69 ± 0.38 <sup>c</sup> |
| nE-/C+ | +   | None                                       | 8.27                                                 | nd                                       | 5.82 ± 0.58 <sup>a</sup>                                           | 2.49 ± 0.19 <sup>b</sup> | 2.30 ± 0.23 <sup>b</sup> |
| nE-/C- | +   | None                                       | Mock                                                 | nd                                       | nd                                                                 | nd                       | nd                       |

nE = non-attenuated *E. tenella* Wis, C = *C. jejuni*, + = administered, - = not administered, nd = none detected. Averages (± SD, shown in italics) that were significantly different within each trial are identified by a different superscript letter (p < 0.05). Mock = no bacterial control.

## References

1. Smith CK, Kaiser P, Rothwell L, Humphrey T, Barrow PA, Jones MA. 2005. Campylobacter jejuni-induced cytokine responses in avian cells. *Infect Immun* 73:2094-100.
2. Forder RE, Natrass GS, Geier MS, Hughes RJ, Hynd PI. 2012. Quantitative analyses of genes associated with mucin synthesis of broiler chickens with induced necrotic enteritis. *Poult Sci* 91:1335-41.
3. Li YP, Bang DD, Handberg KJ, Jorgensen PH, Zhang MF. 2005. Evaluation of the suitability of six host genes as internal control in real-time RT-PCR assays in chicken embryo cell cultures infected with infectious bursal disease virus. *Vet Microbiol* 110:155-65.
4. Eldaghayes I, Rothwell L, Williams A, Withers D, Balu S, Davison F, Kaiser P. 2006. Infectious bursal disease virus: strains that differ in virulence differentially modulate the innate immune response to infection in the chicken bursa. *Viral Immunol* 19:83-91.
5. Rothwell L, Young JR, Zoorob R, Whittaker CA, Hesketh P, Archer A, Smith AL, Kaiser P. 2004. Cloning and characterization of chicken IL-10 and its role in the immune response to *Eimeria maxima*. *J Immunol* 173:2675-2682.
6. Degen WG, Daal N, Rothwell L, Kaiser P, Schijns VE. 2005. Th1/Th2 polarization by viral and helminth infection in birds. *Vet Microbiol* 105:163-7.

7. Hyman HC, Levisohn S, Yogev D, Razin S. 1989. DNA probes for *Mycoplasma gallisepticum* and *Mycoplasma synoviae*: application in experimentally infected chickens. *Vet Microbiol* 20:323-37.
8. De Lisle RC, Roach E, Jansson K. 2007. Effects of laxative and N-acetylcysteine on mucus accumulation, bacterial load, transit, and inflammation in the cystic fibrosis mouse small intestine. *Am J Physiol Gastrointest Liver Physiol* 293:G577-84.
9. Valdivia AG, Martinez A, Damian FJ, Quezada T, Ortiz R, Martinez C, Llamas J, Rodriguez ML, Yamamoto L, Jaramillo F, Loarca-Pina MG, Reyes JL. 2001. Efficacy of N-acetylcysteine to reduce the effects of aflatoxin B1 intoxication in broiler chickens. *Poult Sci* 80:727-34.
